# Supplementary material for: A Novel Aminomethacrylate-Based Copolymer for Solubility Enhancement—From Radical Polymer Synthesis to Manufacture and Characterization of Amorphous Solid Dispersions
Source: MDPI journal article supplement (doi:10.3390/polym14071281), 2022-03-22
Supplement: s1 [file s1]

Supplementary materials

# A Novel Aminomethacrylate-Based Copolymer for Solubility Enhancement—From Radical Polymer Synthesis to Manufacture and Characterization of Amorphous Solid Dispersions

Fabian-Pascal Schmied <sup>1,2</sup>, Alexander Bernhardt <sup>2</sup>, Christian Moers <sup>2</sup>, Christian Meier <sup>3</sup>, Thomas Endres <sup>2</sup> and Sandra Klein <sup>1,\*</sup>

<sup>1</sup> University of Greifswald, Department of Pharmacy, Institute of Biopharmaceutics and Pharmaceutical Technology, Felix-Hausdorff-Straße 3, 17489 Greifswald, Germany; fabian-pascal.schmied@stud.uni-greifswald.de (F.-P.S.); sandra.klein@uni-greifswald.de (S.K.)

<sup>2</sup> Evonik Operations GmbH, Research, Development & Innovation, Kirschenallee, 64293 Darmstadt, Germany; fabian-pascal.schmied@evonik.com (F.-P.S.); alexander.bernhardt@evonik.com (A.B.); christian.moers@evonik.com (C.M.); thomas.endres@evonik.com (T.E.)

<sup>3</sup> Evonik Operations GmbH, Research, Development & Innovation, Rodenbacher Chaussee 4, 63457 Hanau, Germany; christian.meier@evonik.com (C.M.)

\* Correspondence: sandra.klein@uni-greifswald.de; Tel.: +49-3834-420-4897

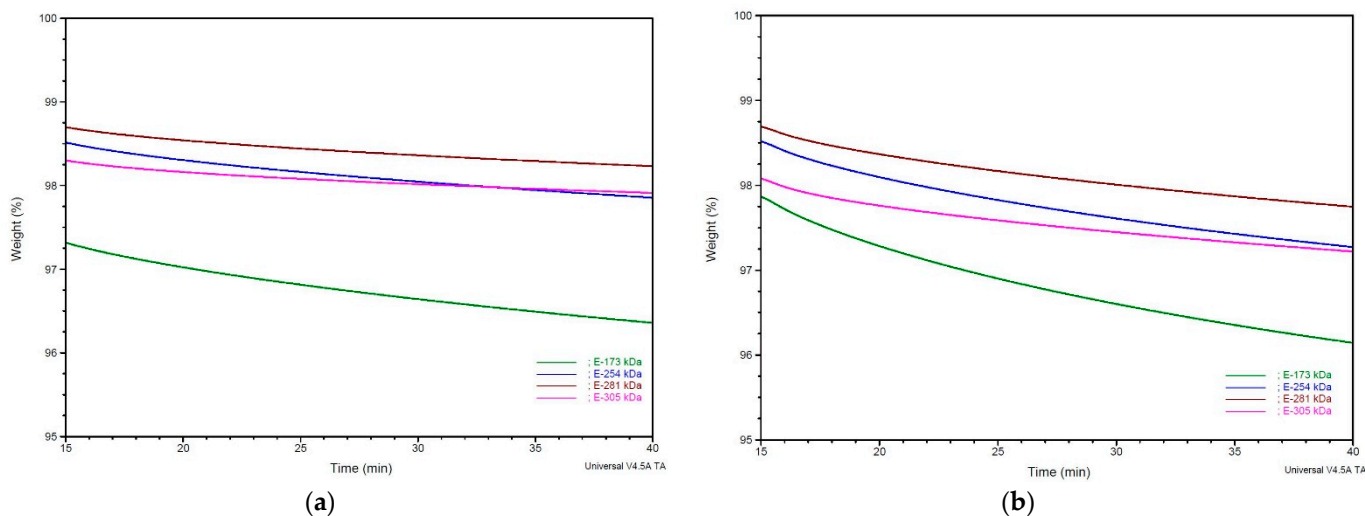

**Figure S1.** Results from isothermal TGA of ModE copolymers at 150 °C (a) and 165 °C (b).

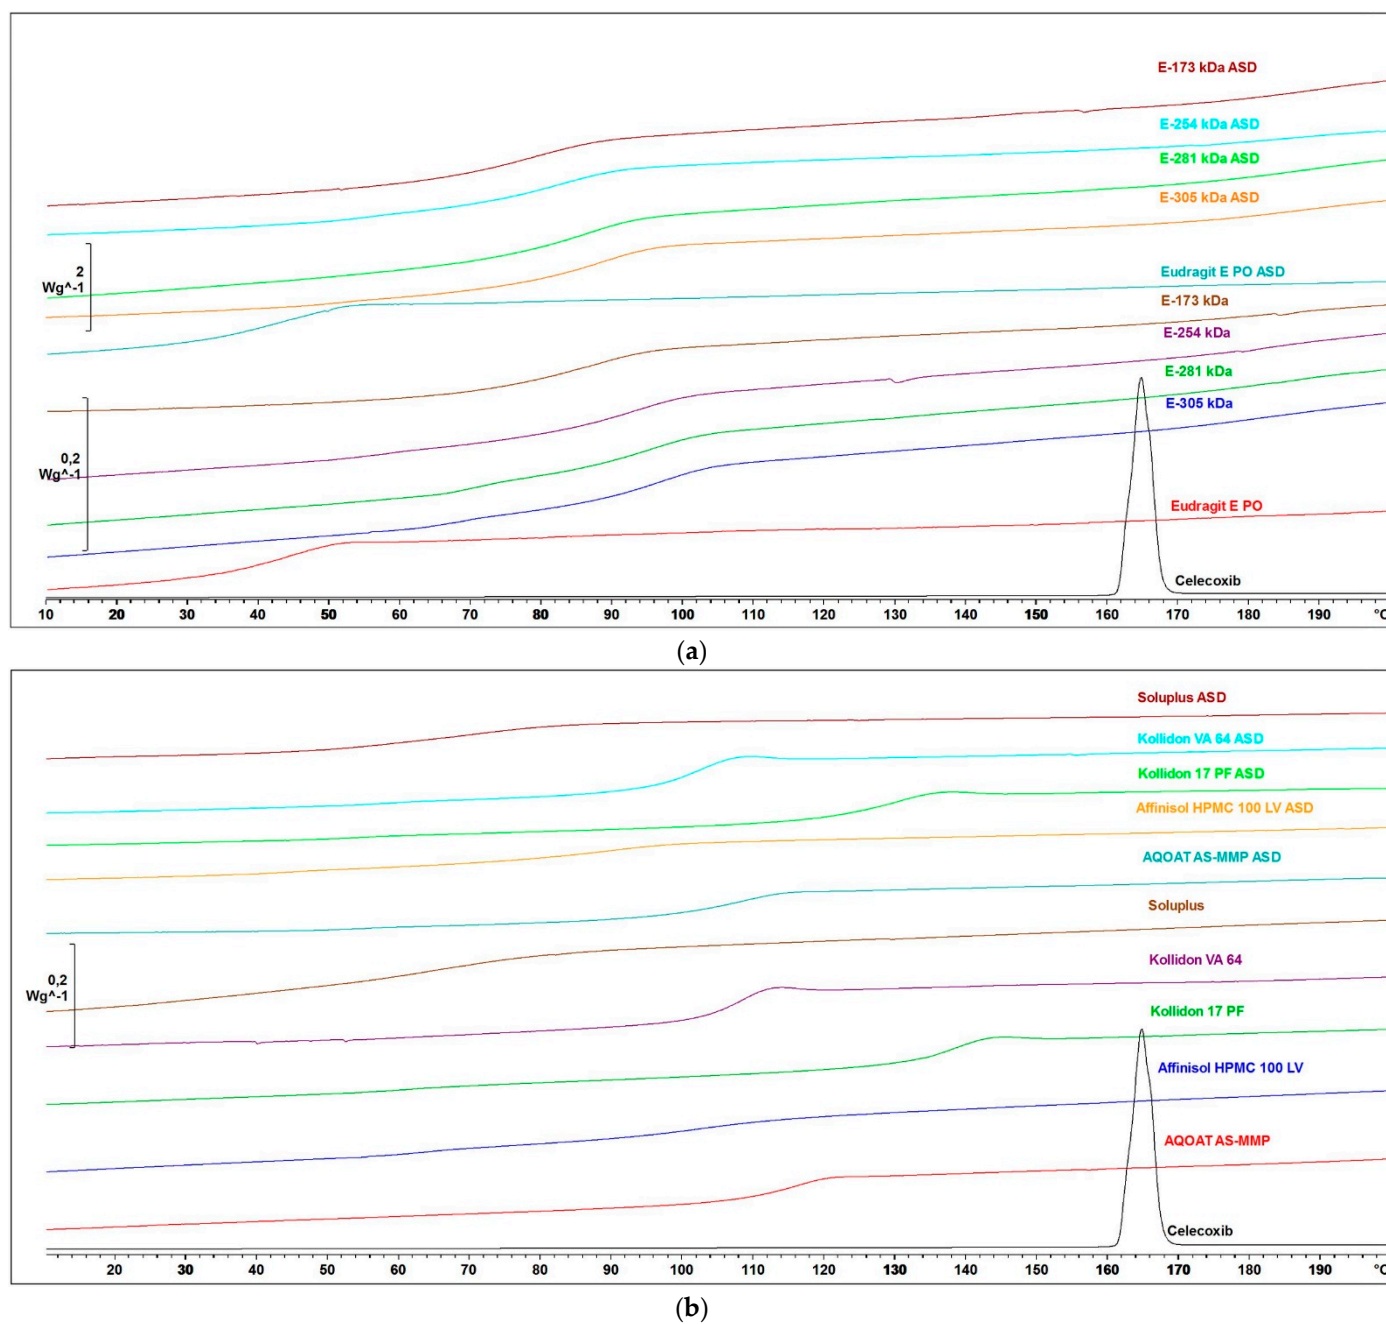

**Figure S2.** DSC thermograms of celecoxib, ModE copolymers, EPO and the corresponding ASDs (a), and celecoxib and other marketed (co-)polymers used in the study, and the corresponding ASDs (b).

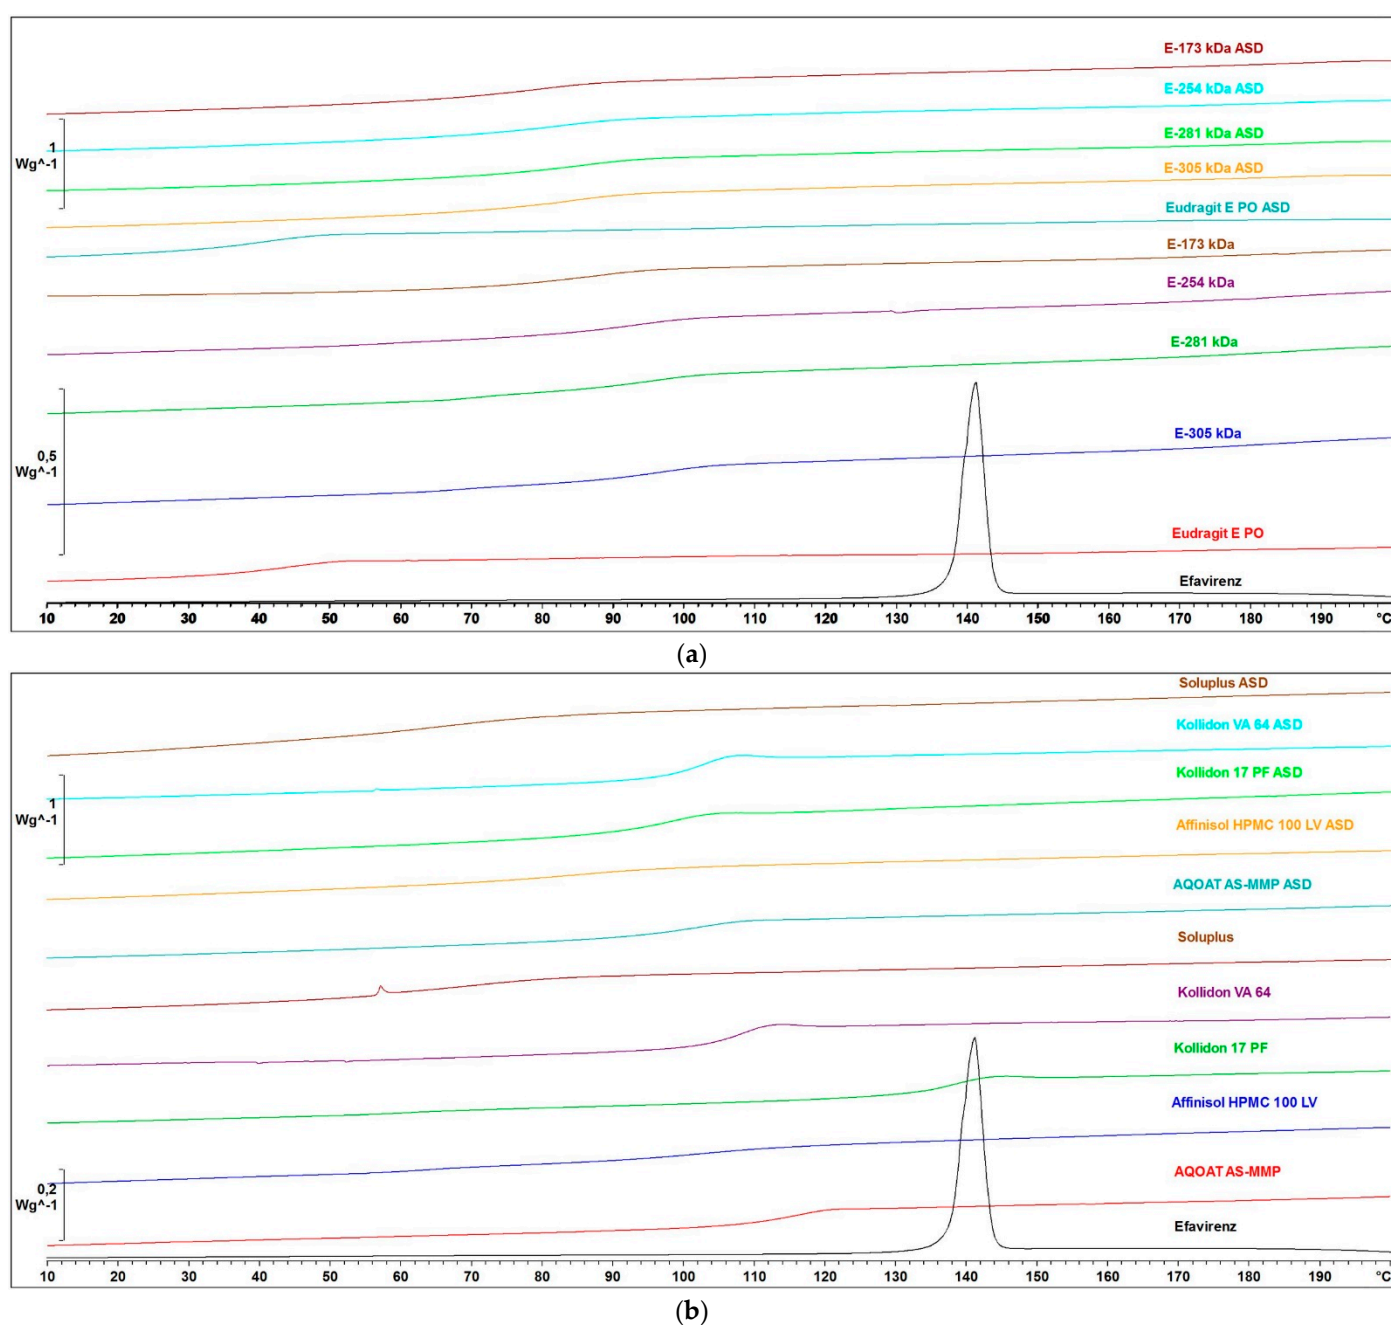

**Figure S3.** DSC thermograms of efavirenz, ModE copolymers, EPO and the corresponding ASDs (a), and efavirenz and other marketed (co-)polymers used in the study, and the corresponding ASDs (b).

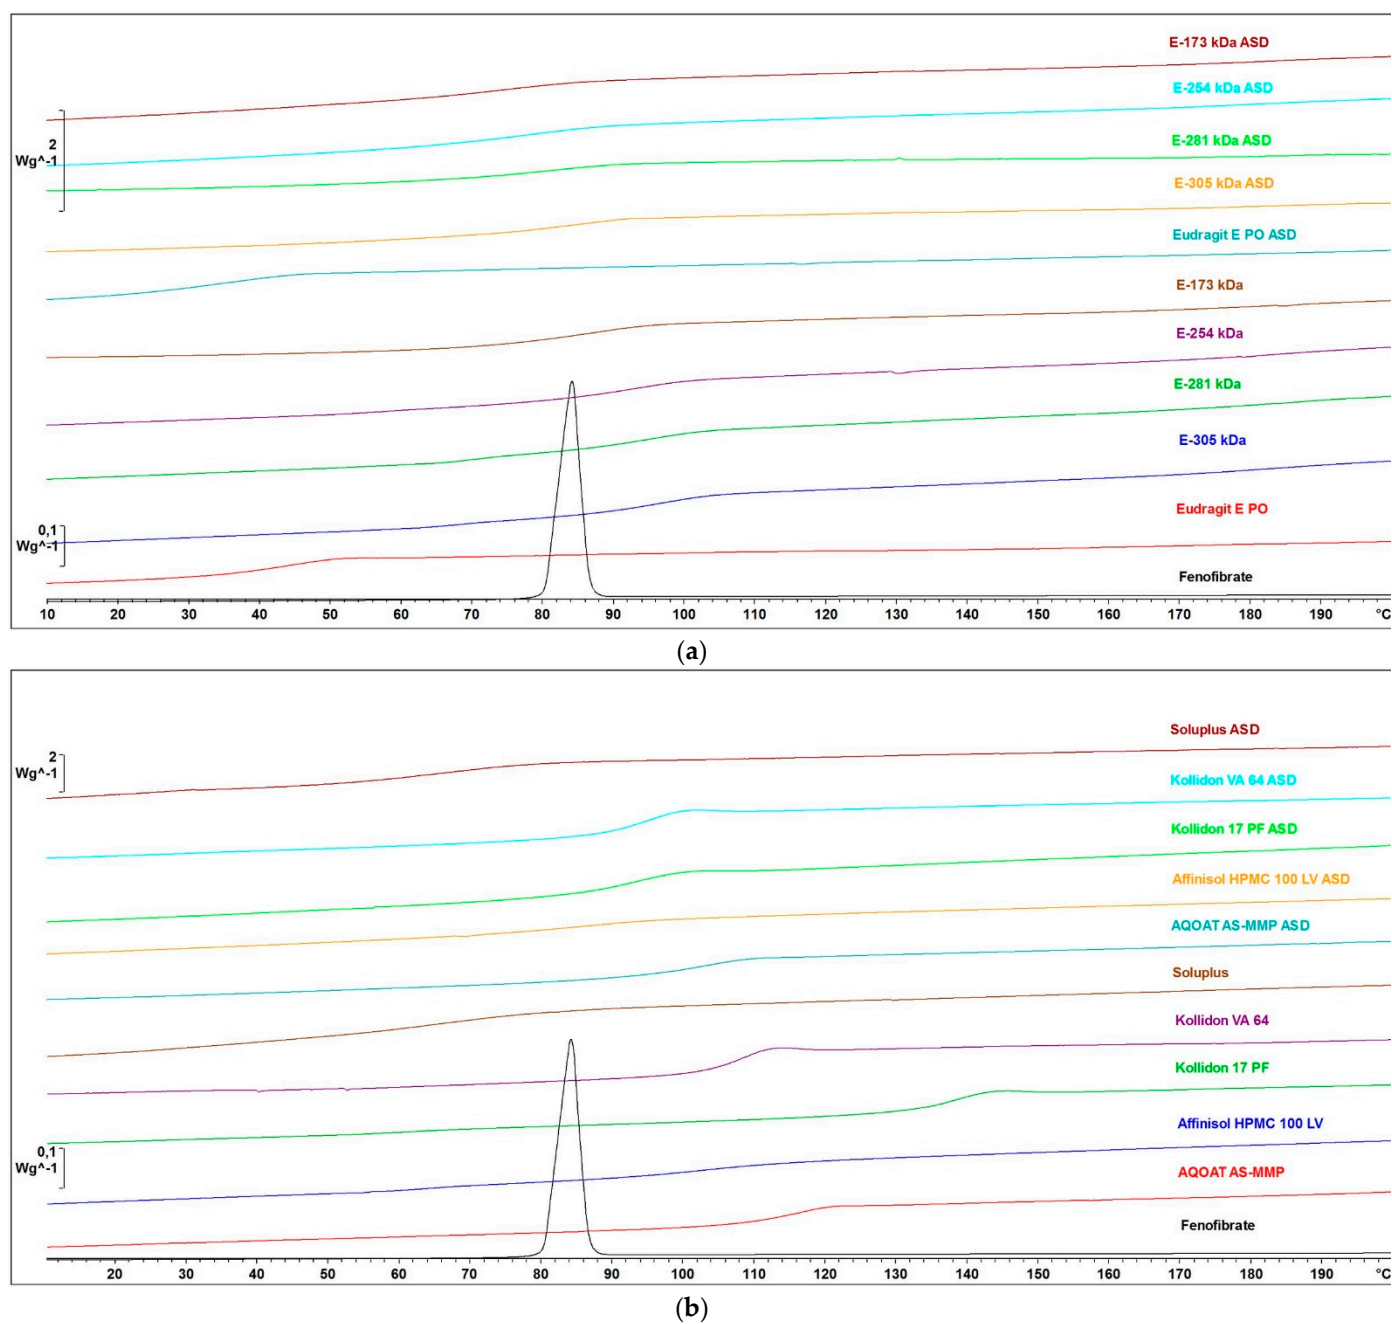

**Figure S4.** DSC thermograms of fenofibrate, ModE copolymers, EPO and the corresponding ASDs (a), and fenofibrate and other marketed (co-)polymers used in the study, and the corresponding ASDs (b).

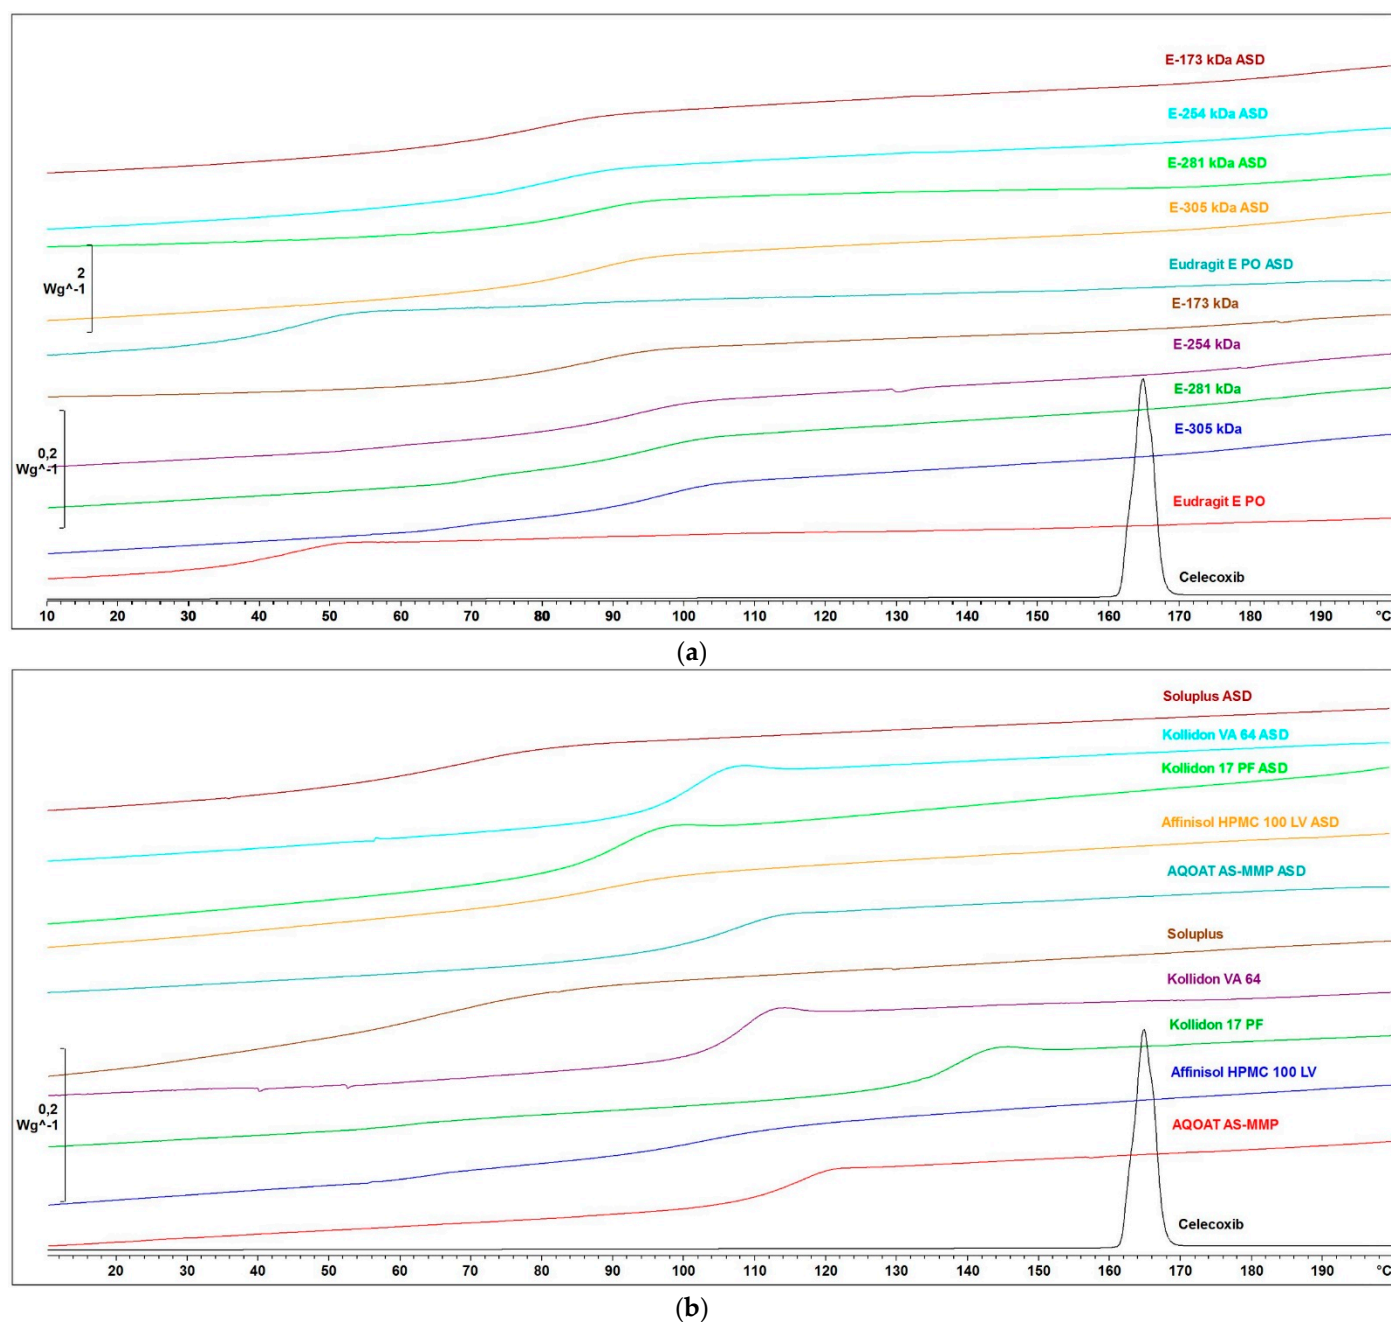

**Figure S5.** DSC thermograms (after three months of storage at 30 °C/65% RH) of celecoxib, Mode copolymers, EPO and the corresponding ASDs (a), and celecoxib and other marketed (co-)polymers used in the study, and the corresponding ASDs (b);.



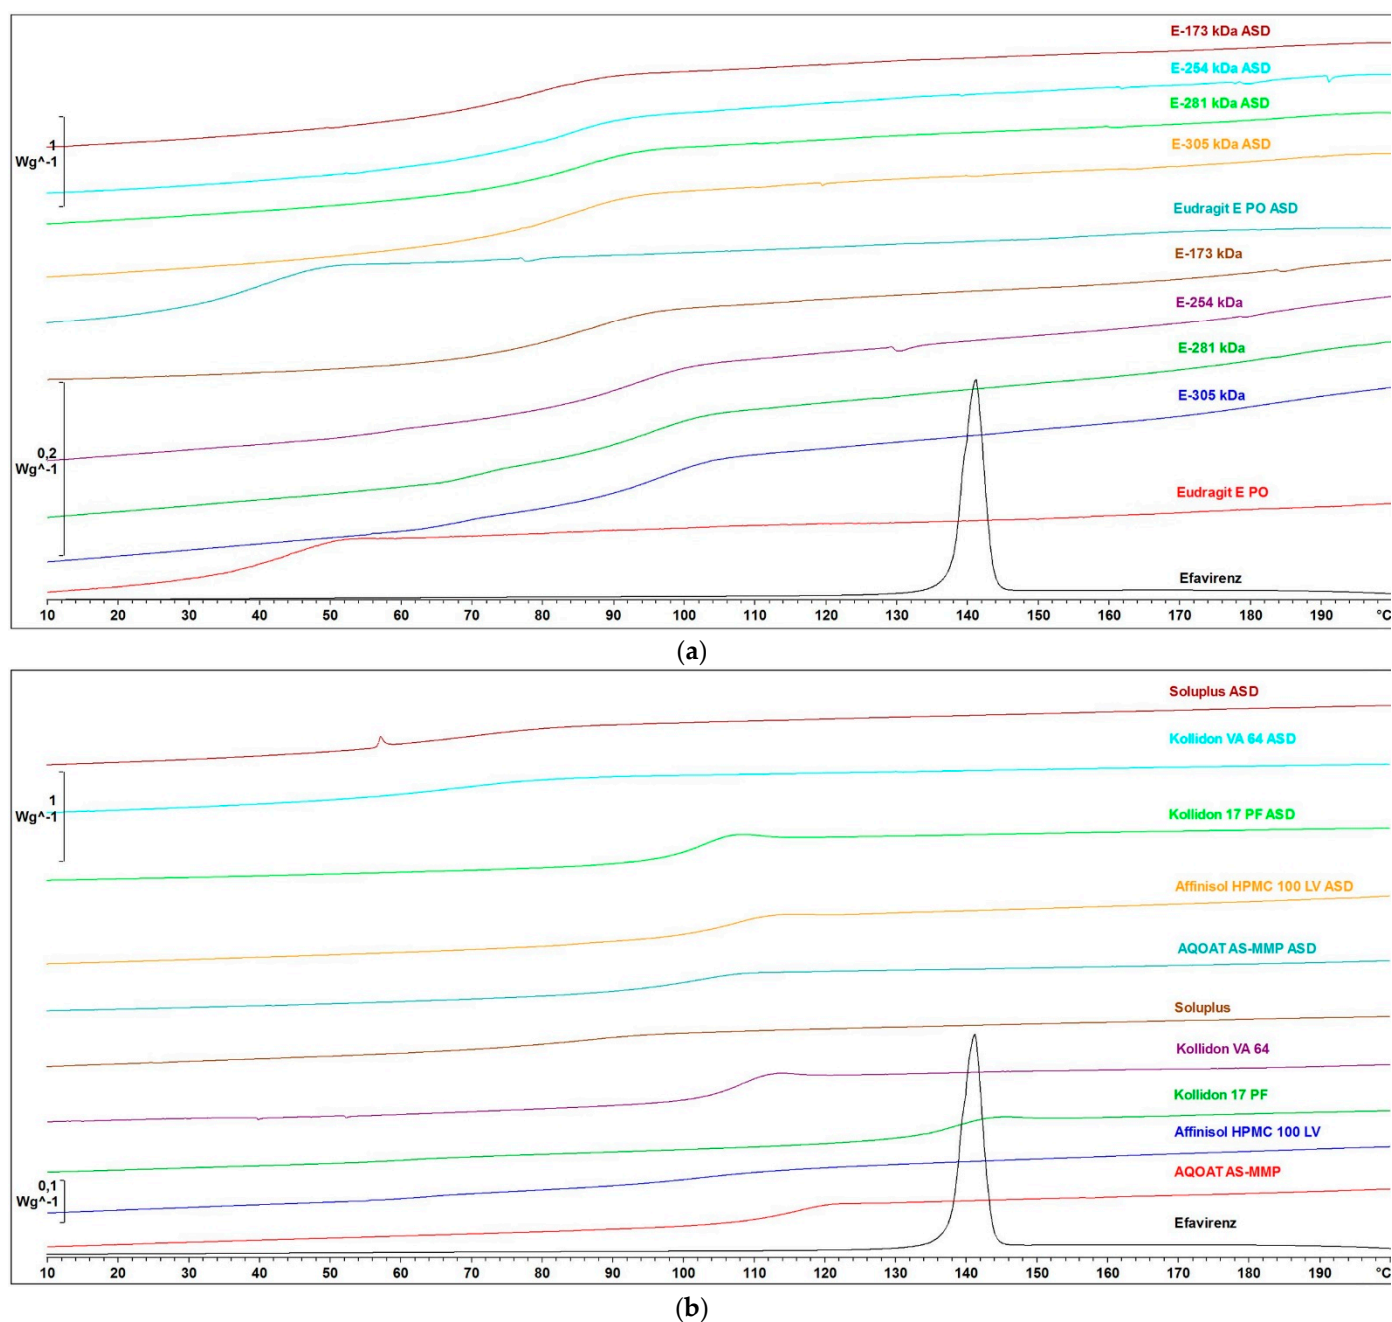

**Figure S6.** DSC thermograms (after three months of storage at 30  $^{\circ}C$ /65% RH) of efavirenz, Mode copolymers, EPO and the corresponding ASDs (a), and efavirenz and other marketed (co-)polymers used in the study, and the corresponding ASDs (b).

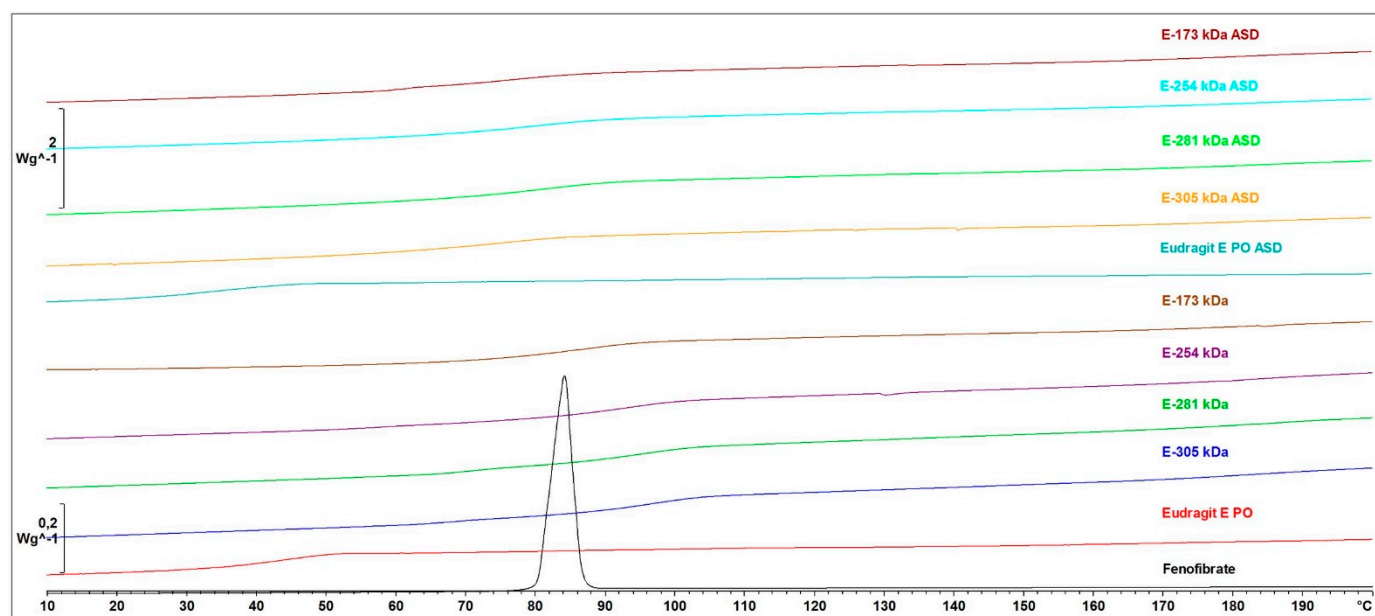

(a)

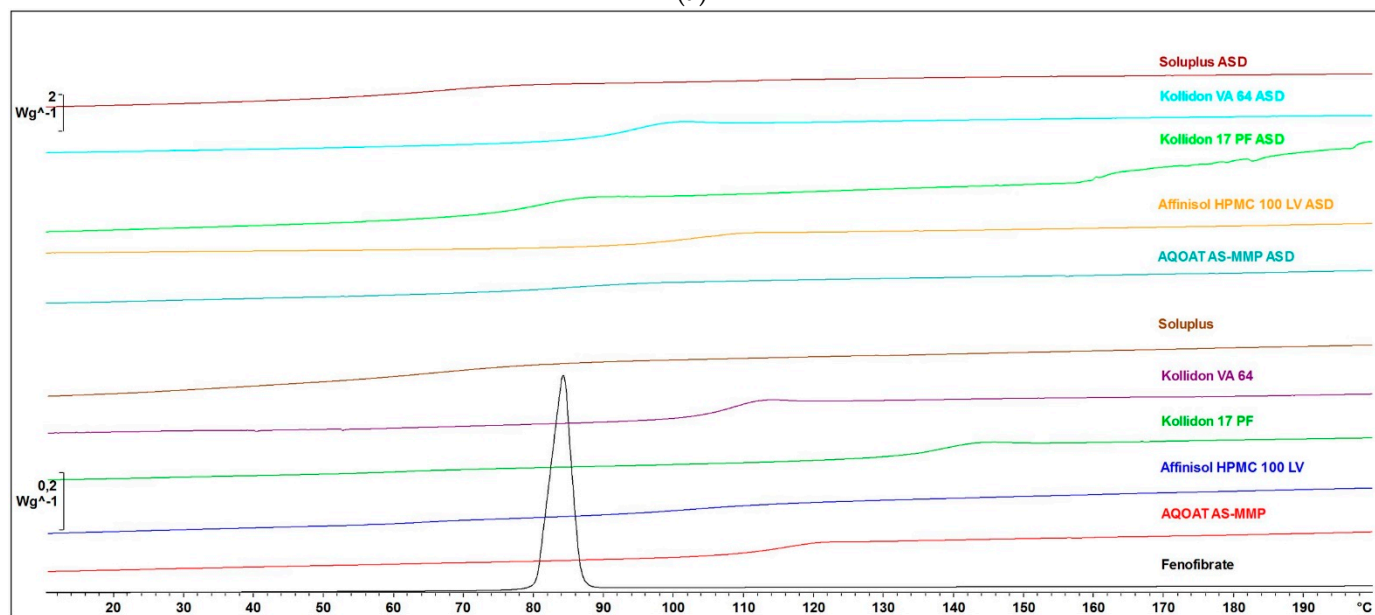

(b)

**Figure S7.** DSC thermograms (after three months of storage at 30 °C/65% RH) of fenofibrate, ModE copolymers, EPO and the corresponding ASDs (a), and fenofibrate and other marketed (co-)polymers used in the study, and the corresponding ASDs (b).
